# Supplementary material for: Preoperative Signs and Symptoms as Prognostic Markers in Nasal Septoplasty
Source: Hindawi journal article supplement (doi:10.1155/2017/4718108), 2017-01-01
Supplement: f1 [file 4718108.f1.pdf]

Date \_\_\_\_\_

|                |
|----------------|
| Identification |
|----------------|

**After operation** (answer when free of a cold/nasal infection)

## NASAL SURGICAL QUESTIONNAIRE

### Is your nasal breathing

- Completely improved     Substantially improved     Mildly improved     Unchanged     Worse

### Rate your sense of obstruction

*Put a mark on this scale*  
**Open** (0=completely open. 10= completely blocked.) **Blocked**

On a normal day      0-----10

At night              0-----10

During exercise      0-----10

### Rate these nasal symptoms

|            | None                     | Slight                   | Moderate                 | Severe                   |
|------------|--------------------------|--------------------------|--------------------------|--------------------------|
| Crusting   | <input type="checkbox"/> | <input type="checkbox"/> | <input type="checkbox"/> | <input type="checkbox"/> |
| Bleeding   | <input type="checkbox"/> | <input type="checkbox"/> | <input type="checkbox"/> | <input type="checkbox"/> |
| Sneezing   | <input type="checkbox"/> | <input type="checkbox"/> | <input type="checkbox"/> | <input type="checkbox"/> |
| Secretion  | <input type="checkbox"/> | <input type="checkbox"/> | <input type="checkbox"/> | <input type="checkbox"/> |
| Nasal pain | <input type="checkbox"/> | <input type="checkbox"/> | <input type="checkbox"/> | <input type="checkbox"/> |

### Rate your use of nasal medication

|                                                                                                     | None                     | Slight                   | Moderate                 | Daily                    |
|-----------------------------------------------------------------------------------------------------|--------------------------|--------------------------|--------------------------|--------------------------|
| Nonprescriptional nasal spray/drops<br>(Naso/Nazaren/Otrivin/Rhinox/Zymelin/Zycomb)                 | <input type="checkbox"/> | <input type="checkbox"/> | <input type="checkbox"/> | <input type="checkbox"/> |
| Corticosteroid nasal spray/drops<br>(Avamys/Budesonid/Flutide nasal/<br>Nasacort/Nasonex/Rhinocort) | <input type="checkbox"/> | <input type="checkbox"/> | <input type="checkbox"/> | <input type="checkbox"/> |
| Antihistamines<br>(Aerius/Alzylr/Cetirizin/Clarityn/Kestine/<br>Loratadin/Telfast/Zyrtec/Xyzal)     | <input type="checkbox"/> | <input type="checkbox"/> | <input type="checkbox"/> | <input type="checkbox"/> |

### Smoking

- None     1-10 daily     11 or more daily

### Do you suffer from nasal allergy

- Yes     No     Uncertain

If yes

do you have nasal allergy at present     Yes     No

do you use allergy medication at present     Yes     No
